# Supplementary material
Source: ML conference proceedings conference paper supplement (https://openaccess.thecvf.com/content/ICCV_2017/html/Ronchi_Benchmarking_and_Error_ICCV_2017_paper.html)
Supplement: Supplementary file 5 [file Ronchi_Benchmarking_and_Error_ICCV_2017_supplemental.zip]

Archive with 4 entries (4 files):
- 0067-cmu-performance-report.pdf
- 0067-grmi-performance-report.pdf
- 0067-maskrnn-performance-report.pdf
- 0067-supp.pdf
